# Supplementary material for: Chemical fabrication and synergistic mechanism of N-doped carbon modified with FeP as catalysts for flexible rechargeable Zn–air batteries
Source: Royal Society of Chemistry journal article supplement (doi:10.1039/d4se00197d), 2024-01-01
Supplement: d4se00197d1.pdf [file d4se00197d1.pdf]

## Supporting Information

### **Chemical Fabrication and Synergistic Mechanism of N-doped Carbon Modified with FeP as Catalysts for Flexible Rechargeable Zn-Air Batteries**

Xianli Wu,<sup>a,#</sup> Ting Zhou,<sup>a,#</sup> Guosheng Han,<sup>a</sup> Shuling Liu,<sup>a</sup> Mengmeng Cao,<sup>a</sup> Shuqi Li,<sup>b</sup> Jiawen Wang,<sup>a</sup> Yanyan Liu,<sup>a,b,c,\*</sup> Jianchun Jiang,<sup>c</sup> Yongfeng Wang,<sup>d</sup> Baojun Li<sup>a,e</sup>

<sup>a</sup> College of Chemistry, Zhengzhou University, 100 Science Road, Zhengzhou 450001, P R China

<sup>b</sup> College of Science, Henan Agricultural University, 63 Nongye Road, Zhengzhou 450002, P R China

<sup>c</sup> Institute of Chemical Industry of Forest Products, CAF, National Engineering Lab for Biomass Chemical Utilization, Nanjing 210042, P R China

<sup>d</sup> Center for Carbon-based Electronics and Key Laboratory for the Physics and Chemistry of Nanodevices, Department of Electronics, Peking University, Beijing 100871, P.R. China

<sup>e</sup> Department of Chemistry, Tsinghua University, Beijing 100084, P. R. China

# These Authors contribute equally to this work

\* Corresponding author. E-mail: lyyllhs180208@163.com (Y.Y. Liu)

† Electronic Supplementary Information (ESI) available: Some characterization results.  
See DOI: 10.1039/x0xx00000x

## **1. Experimental section**

### **1.1 Characterization**

On an X-ray diffractometer (Bruker, D8 Advance, Cu K = 1.5418 Å), powder X-ray diffraction (PXRD) patterns of as-prepared materials were obtained. The Raman spectrum was obtained using a Renishaw RM-2000 and an Air-ion laser (= 514 nm). Scanning electron microscopy (SEM, ZEISS Sigma 500) and transmission electron microscopy (TEM, FEI Tecnai G<sup>2</sup> F20 S-TWIN electron microscope, operating at 200 kV) were used to examine the morphologies of as-prepared materials. On a Thermo Scientific ESCALAB 250 instrument, X-ray photoelectron spectroscopy (XPS) was performed. The XPSPEAK41 program was used to fit the XPS data. Shirley served as the backdrop tape for all high-resolution XPS spectra. The ASAP 2460 analyzer (USA) was used to carry out the N<sub>2</sub> adsorption-desorption studies at 77.3 K. The surface area was determined using the Brunauer-Emmett-Teller (BET) method, and the nonlocalized density functional theory was used to examine the catalyst's pore size distribution (NLDFT).

### **1.2 Electrochemical measurements**

All electrochemical measurements of ORR were performed on a CHI 760E. Electrochemical Analyzer with rotating disk electrode (RDE) or rotating ring disk electrode (RRDE) as working electrode, Pt wire as the counter electrode, and Ag/AgCl as a reference electrode. The working electrodes were bought from Pine. The electrolyte of reference electrode is a saturated KCl solution. In this work, all electrode potentials were referenced to the reversible hydrogen electrode (RHE) based on the following

calculation equations:

$$E_{v,sR} = E_{v,sA} - 0.059 \text{pH} + 0.197 \quad (1)$$

The electrode working area of the rotating disk electrode (RDE) is 0.196 cm<sup>2</sup> and the rotating ring-disk electrode (RRDE) is 0.217 cm<sup>2</sup>. The RRDE consists of a glassy carbon disk (GC) surrounded by a Pt ring, while there is only a GC in the center of the RDE. The catalyst ink was prepared by ultrasonic dispersion of 4 mg catalyst in a hybrid solution including 500 μL ethanol and 50 μL Nafion.15 μL ink was coated onto working electrode. CV measurements were carried out in O<sub>2</sub>/N<sub>2</sub>-saturated 0.1 M KOH solution in the voltage range of 0–1.2 V for all the samples with a scan rate of 50 mV s<sup>-1</sup>. LSV measurements were carried out in O<sub>2</sub>-saturated 0.1 M KOH solution at different rotating rates from 400 to 2025 rpm with a scan rate of 5 mV s<sup>-1</sup>. Tafel slopes were obtained from the Tafel equation:

$$E = a + b \log |j_k| \quad (2)$$

$E$  is the applied potential of LSV tests, and  $a$  is a constant,  $b$  is the Tafel slope and  $J_k$  is the kinetic current density.

Moreover, the Kinetic properties of ORR were also carried out with RRDE in an O<sub>2</sub>-saturated 0.1 M KOH solution with a scan rate of 5 mV s<sup>-1</sup>. The yields of peroxide species and the electron transfer number can be calculated from the LSV of RRDE measurement at 1600 rpm via the following equation:

$$n = 4 \frac{I_D}{I_D + I_R/N} \quad (3)$$

$$H_2O_2(\%) = 200 \frac{I_R/N}{I_D + (I_R/N)} \quad (4)$$

The  $I_D$  is the disk current and  $I_R$  is the ring current. The  $N$  represents the current collection efficiency equaled to 0.41 of the RRDE in our experimental system.

The accelerated durability test (ADT) was performed by CV in 0.1 M O<sub>2</sub>-saturated KOH solution for 5000 cycles with a scan rate of 50 mV s<sup>-1</sup>. Methanol resistance was measured by adding methanol to 100 mL 0.1 M KOH under 800 rpm at the 400th second. The concentration of CH<sub>3</sub>OH in the electrolyte was 1 M. The chronoamperometry test was performed on FeP@NPW at 0.8 V for 22 h in O<sub>2</sub>-saturated 0.1 M KOH solution on the RDE at 800 rpm. For the OER, the polarization curves were also recorded in voltage range of 1.1-1.9 V and the scan rate is 5 mV s<sup>-1</sup>. To avoid the peeling of the catalyst caused by evolved O<sub>2</sub> adhesion, a rotation speed of 1600 rpm was offered during the OER. The electrochemical active surface area (ECSA) was calculated by comparing the double-layer capacitance ( $C_{dl}$ ) of the electrocatalysts, with higher  $C_{dl}$  exhibiting greater ECSA.  $C_{dl}$  was measured by cyclic voltammetry (CV) at different scan speeds (5, 10, 15, 20, 25, and 30 mV s<sup>-1</sup>) inside the non-Faradaic potential window. The  $C_{dl}$  value was calculated as the slope of a straight line from the plot of current density (half the sum of absolute values of current density at 1.10 V vs RHE) vs scan rate. The results of electrochemical impedance spectroscopy (EIS) were acquired over a frequency range of 0.01 to 100 kHz.

### **1.3 Zinc-air battery test**

For aqueous Zinc-air batteries, FeP@NPW powder catalyst was loaded on carbon fiber and used as the air electrode. FeP@NPW ink was prepared by taking 4 mg FeP@NPW powder, 320  $\mu$ L ethanol, 80  $\mu$ L deionized water and 16  $\mu$ L Nafion. The ink was drip-

coated on 2 cm×2 cm carbon paper with a pipetting gun, and then dried at 60°C for 3h to obtain the catalytic layer of air electrode. In the 20% Pt/C+RuO<sub>2</sub> ink, 20% Pt/C and RuO<sub>2</sub> are both 2 mg, and the other conditions are the same as FeP@NPW. 6 M KOH and 0.2 M Zn(OAc)<sub>2</sub> were used as the electrolyte. The electrolyte was able to circulate between the positive and negative electrodes under the drive of a small motor. A Celgard 2340 microfiber filter was utilized as a separator. A polished high-purity Zinc plate was chosen as the negative electrode. The flexible Zinc-air battery was assembled by using Zinc foil (3 cm \* 1 cm \* 0.03 cm) as an anode, integrated FeP@NPW as air electrode, and nickel foam as current collector. The gel electrolyte was placed between Zinc anode and air electrode.

## 2. Supplementary Figures and Tables

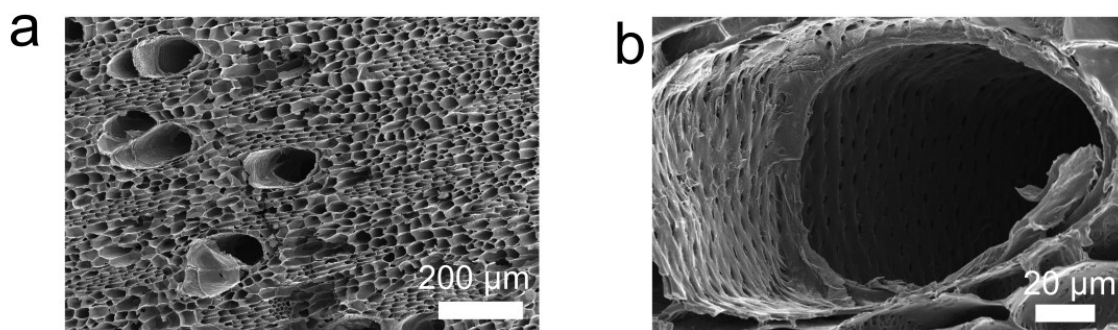

**Fig.S1.** SEM images of PW.

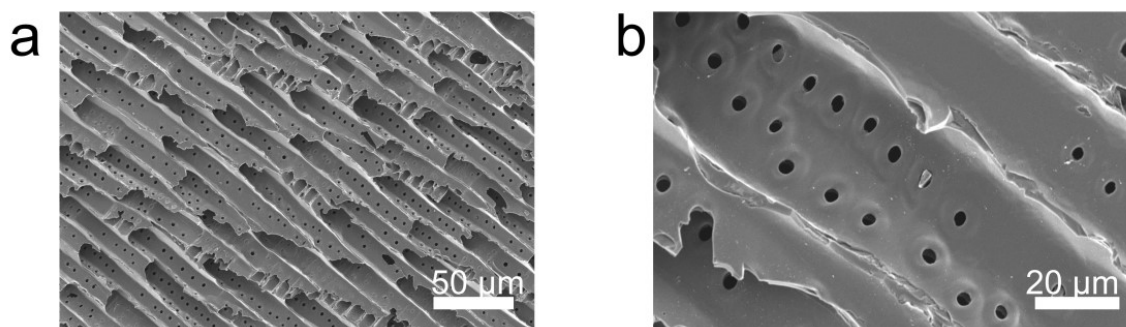

**Fig. S2.** SEM images of NPW

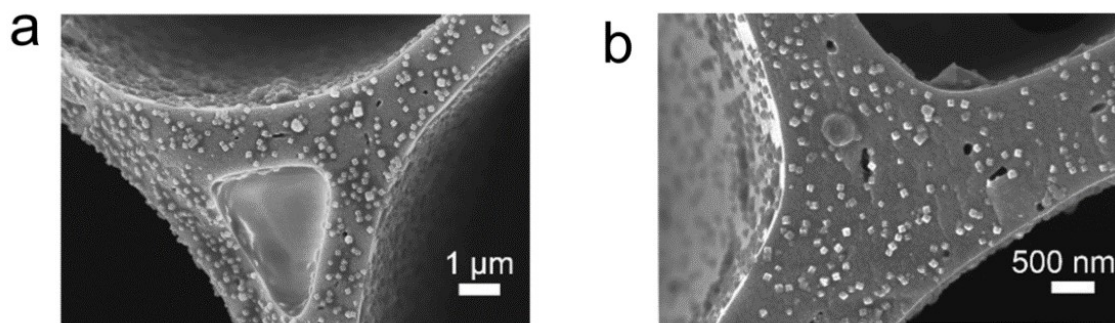

**Fig. S3.** SEM images of PB@NPW(a); SEM images of FeP@NPW(b).

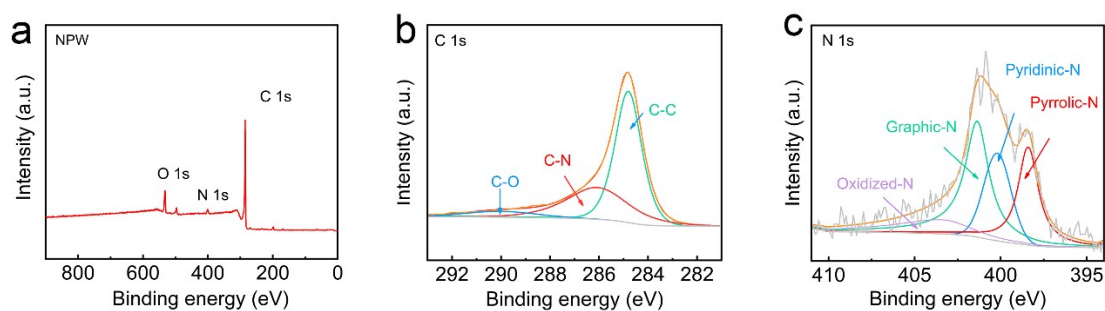

**Figure S4.** (a) the XPS survey spectrum of NPW. High-resolution XPS spectra and corresponding residual plots of (b) C 1s and (c) N 1s

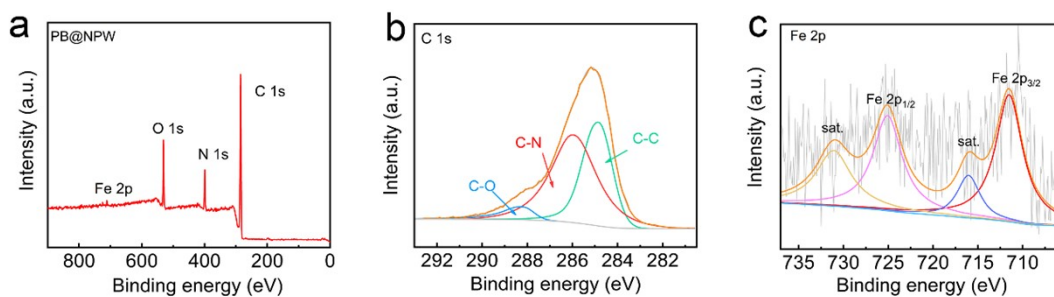

**Figure S5.** (a) the XPS survey spectrum of PB@NPW. High-resolution XPS spectra and corresponding residual plots of (b) C 1s and (c) Fe 2p

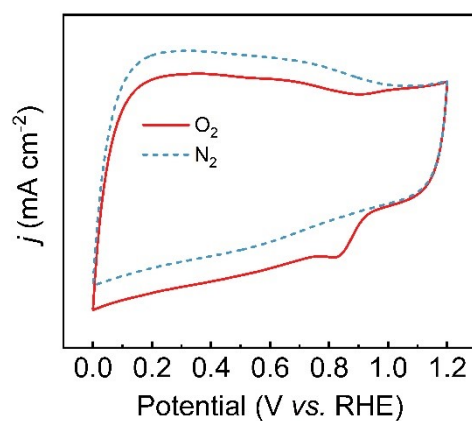

**Fig. S6.** CV curves of FeP@NPW in O<sub>2</sub>/N<sub>2</sub>-saturated 0.1 M KOH.

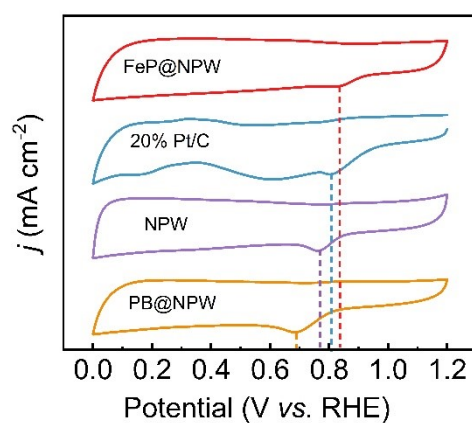

**Fig. S7.** CV curves of FeP@NPW, PB@NPW, NPW, and Pt/C in O<sub>2</sub>-saturated 0.1 M KOH.

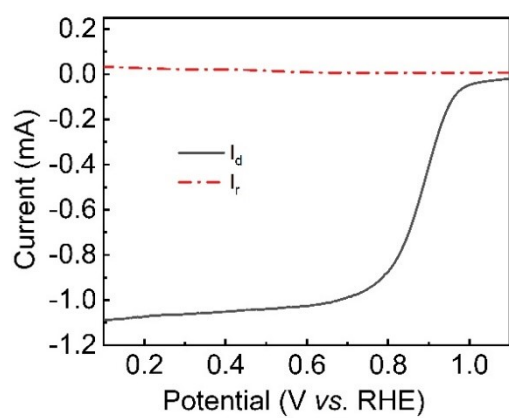

**Fig. S8.** Disk and ring current obtained by LSV on a RRDE for FeP@NPW.

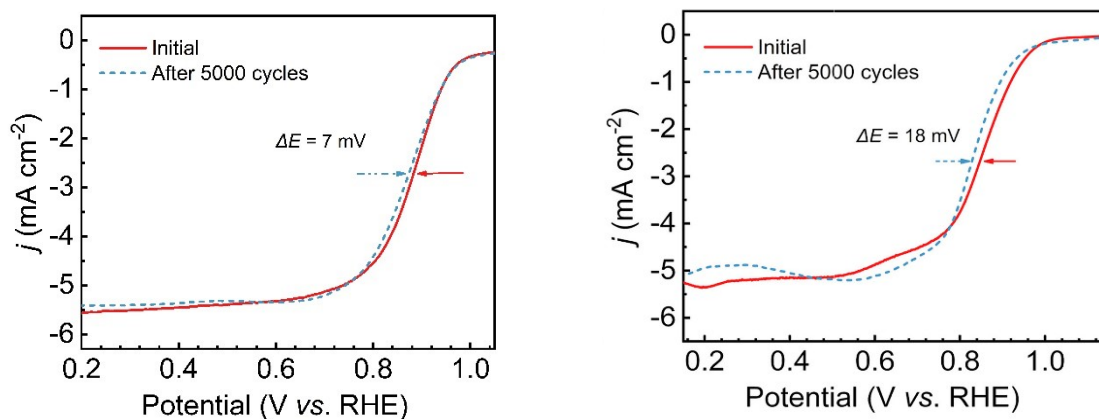

**Fig. S9.** The LSV curves of FeP@NPW (a) 20% Pt/C (b) and before and after accelerated durability test.

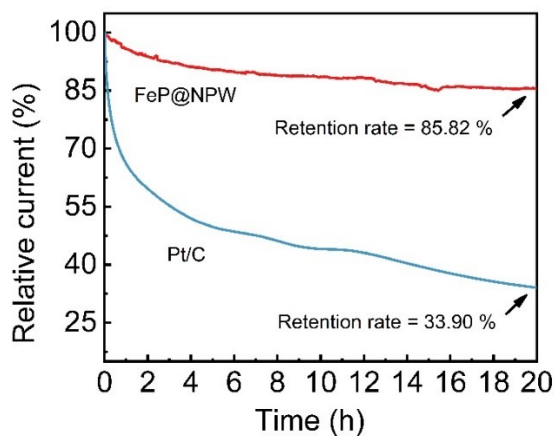

**Fig. S10.** Chronoamperometric response of FeP@NPW and 20% Pt/C.

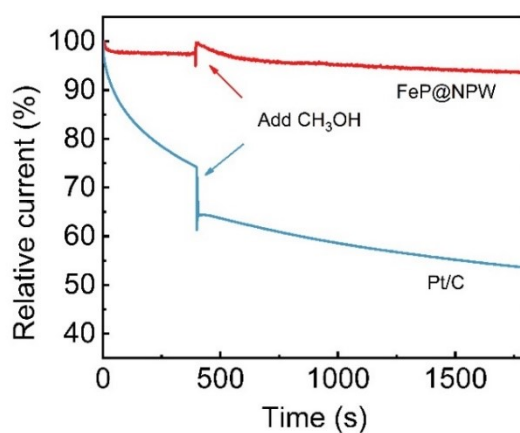

**Fig. S11.** Methanol tolerant tests of FeP@NPW and 20% Pt/C.



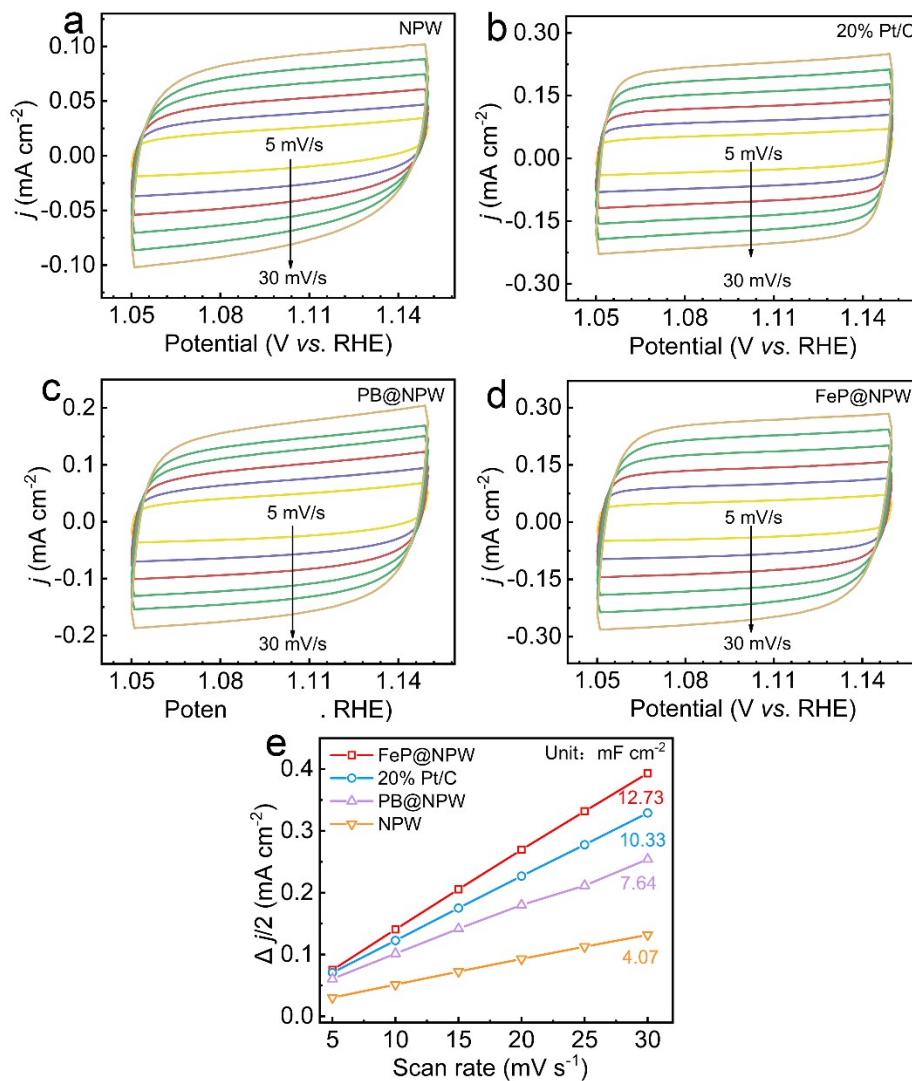

**Fig. S12.** CV curves of (a) NPW, (b) Pt/C, (c) PB@NPW, (d) FeP@NPW at various scan rates from 5 to 30 mV s<sup>-1</sup>, (e) The summarized double layer capacitance (Cdl) of all sample, (f) Nyquist plots of FeP@NPW, PB@NPW, NPW, and Pt/C.

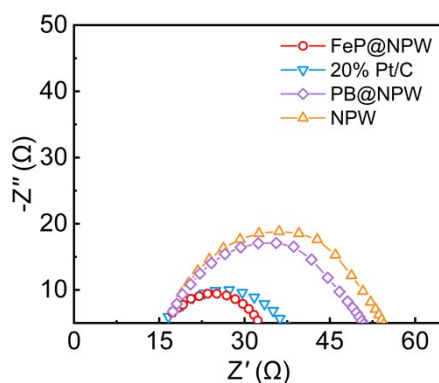

**Fig. S13.** Nyquist plots of FeP@NPW, PB@NPW, NPW, and Pt/C.

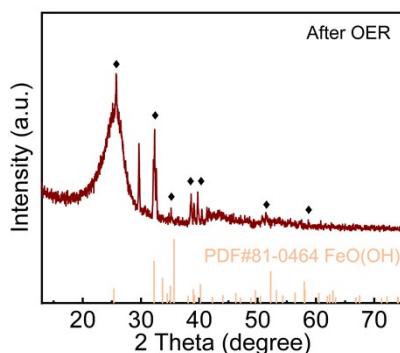

**Fig. S14.** XRD patterns of FeP@NPW before and after OER.

**Table S1.** Element analysis result of FeP@NPW determined by XPS.

| Catalyst        | C<br>(at.%) | N<br>(at.%) | Fe<br>(at.%) | P<br>(at.%) | O<br>(at.%) |
|-----------------|-------------|-------------|--------------|-------------|-------------|
| Co-BTC-bipy-700 | 74.3        | 3.3         | 2.3          | 3.0         | 17.1        |

**Table S2.** Bifunctional performance comparison of FeP@NPW the electrocatalyst with non-precious metal catalysts in alkaline solution.

| Catalyst               | $E_{1/2}$ | $E_{j=10}$ | $\Delta E$ | Reference        |
|------------------------|-----------|------------|------------|------------------|
| FeP@NPW                | 0.88      | 1.53       | 0.65       | <b>This work</b> |
| FeCo/Se-CNT            | 0.90      | 1.65       | 0.75       | [1]              |
| FePc  CNTs  NiCo/<br>C | 0.90      | 1.58       | 0.68       | [2]              |
| Co-N-PCN               | 0.82      | 1.61       | 0.79       | [3]              |
| Fe-NSDC                | 0.84      | 1.64       | 0.80       | [4]              |
| CoSAs@CNT              | 0.86      | 1.64       | 0.78       | [5]              |
| Fe-NC SAC              | 0.88      | 1.68       | 0.80       | [6]              |
| CoN4/NG                | 0.87      | 1.61       | 0.74       | [7]              |

|                                      |      |      |      |      |
|--------------------------------------|------|------|------|------|
| Co <sub>9</sub> S <sub>8</sub> /CNT  | 0.82 | 1.59 | 0.78 | [8]  |
| FeMn-DSAC                            | 0.92 | 1.63 | 0.71 | [9]  |
| FeCo-ACM                             | 0.90 | 1.60 | 0.70 | [10] |
| Mn SAC                               | 0.91 | 1.58 | 0.67 | [11] |
| Ni <sub>2</sub> P <sub>5</sub> @NCNT | 0.77 | 1.59 | 0.82 | [12] |
| LO-NF-NCNs                           | 0.77 | 1.71 | 0.94 | [13] |
| Co-BTC-bipy-700                      | 0.79 | 1.63 | 0.84 | [14] |

---

## References

1. Y. Sha, Y. Peng, K. Huang, L. Li, Z. Liu, *Adv. Energy Mater.*, 2022, **12**, 2200906.
2. H. Zhang, M. Zhao, H. Liu, S. Shi, Z. Wang, B. Zhang, L. Song, J. Shang, Y. Yang, C. Ma, L. Zheng, Y. Han, W. Huang, *Nano Lett.*, 2021, **21**, 2255–2264.
3. Y. Tang, R. Liu, S. Liu, B. Zheng, Y. Lu, R. Fu, D. Wu, M. Zhang, M. Rong, *Carbon*, 2019, **141**, 704–711.
4. J. Zhang, M. Zhang, Y. Zeng, J. Chen, L. Qiu, H. Zhou, C. Sun, Y. Yu, C. Zhu, Z. Zhu, *Small*, 2019, **15**, 1900307.
5. S. Dilpazir, H. He, Z. Li, M. Wang, P. Lu, R. Liu, Z. Xie, D. Gao, G. Zhang, *ACS Appl. Energy Mater.*, 2018, **1**, 3283–3291.
6. C. Du, Y. Gao, J. Wang, W. Chen, *J. Mater. Chem. A*, 2020, **8**, 9981–9990.
7. L. Yang, L. Shi, D. Wang, Y. Lv, D. Cao, *Nano Energy*, 2018, **50**, 691–698.
8. H. Li, Z. Guo, X. Wang, *J. Mater. Chem. A*, 2017, **5**, 21353–21361.
9. T. Cui, Y.-P. Wang, T. Ye, J. Wu, Z. Chen, J. Li, Y. Lei, D. Wang, Y. Li, *Angew. Chem. Int. Ed.*, 2022, **61**, e202115219.
10. C. Chen, D. Cheng, S. Liu, Z. Wang, M. Hu, K. Zhou, *Energy Stor. Mater.*, 2020, **24**, 402–411.
11. H. Shang, W. Sun, R. Sui, J. Pei, L. Zheng, J. Dong, Z. Jiang, D. Zhou, Z. Zhuang, W. Chen, J. Zhang, D. Wang, Y. Li, *Nano Lett.*, 2020, **20**, 5443–5450.
12. J. Lv, S.C. Abbas, Y. Huang, Q. Liu, M. Wu, Y. Wang, L. Dai, *Nano Energy*, 2018, **43**, 130–137.

13. Z. Wang, F. Zhang, C. Jin, Y. Luo, J. Sui, H. Gong, R. Yang, *Carbon*, 2017, **115**, 261–270.
14. X. Zhang, J. Luo, H.-F. Lin, P. Tang, J.R. Morante, J. Arbiol, K. Wan, B. W. Mao, L. M. Liu, J. Fransaer, *Energy Stor. Mater.*, 2019, **17**, 46–61.
